# Supplementary material for: Digestion-Specific Acupuncture Effect on Feeding Intolerance in Critically Ill Post-Operative Oral and Hypopharyngeal Cancer Patients: A Single-Blind Randomized Control Trial
Source: MDPI journal article supplement (doi:10.3390/nu13062110), 2021-06-19
Supplement: s1 [file s1]

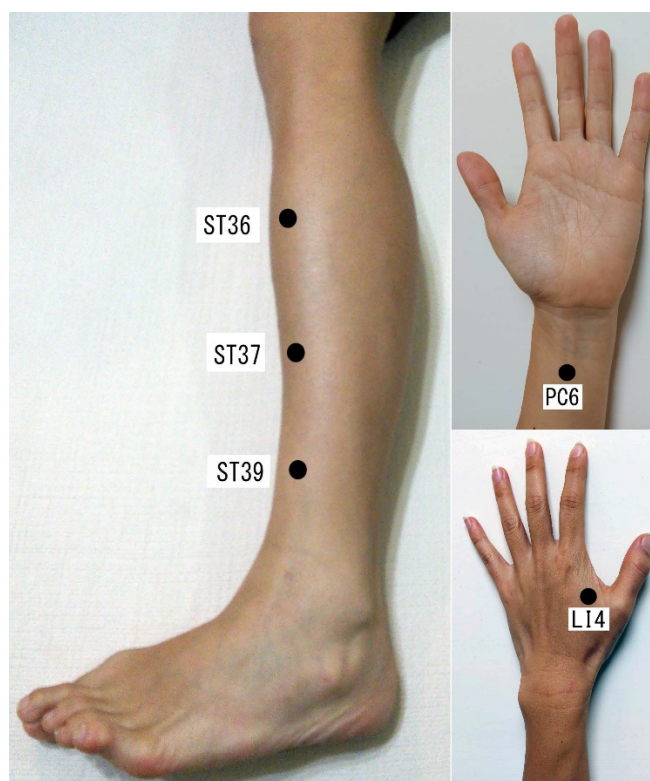

**Figure S1.** Acupuncture points for treatment group. Figure Legend: The Figure represent acupoint that are indicated to treat indigestion and indigestion related symptoms. The acupoints were: ST36 (Zusanli), ST37 (Shangjuxu), ST39 (Xiajuxu), PC6 (Neiguan), and LI4 (Hegu).

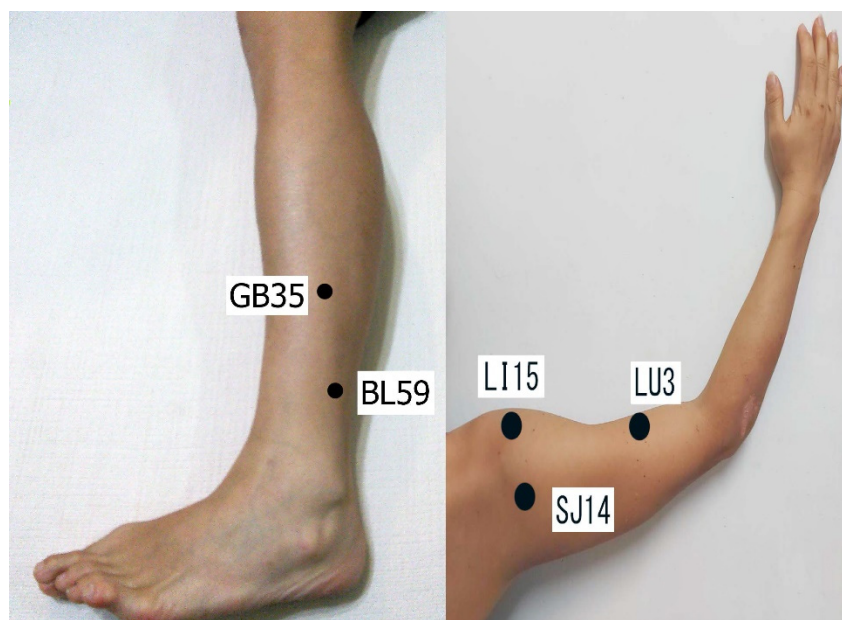

**Figure S2.** Acupuncture points for control group. Figure Legend: The Figure represent acupoint that are not indicated to treat indigestion or indigestion related symptoms. The acupoints were: LI 15 (Jiayu), SJ 14 (JianLiao), LU3 (Tianfu), GB35 (Yangjiao), BL 59 (Fuyang).

**Table S1.** Acupuncturist group speculation.

|               | Intervention group | Control group | P-value |
|---------------|--------------------|---------------|---------|
| Guess correct | 12 (91.6%)         | 12 (91.6%)    | 1.000   |
| Guess wrong   | 1 (8.3%)           | 1 (8.3%)      | 1.000   |

Supplementary Table 1: The table describes the percentage of acupuncturist correct and incorrect guess for each intervention. Data are presented as N and percentage values, \* refers to significant P-value levels lower to 0.05.

**Table S2.** STRICTA 2010 checklist.

| Item                                   | Detail                                                                                                                                                                      | Page                     |
|----------------------------------------|-----------------------------------------------------------------------------------------------------------------------------------------------------------------------------|--------------------------|
| 1. Acupuncture rationale               | 1a) Style of acupuncture (e.g. Traditional Chinese Medicine, Japanese, Korean, Western medical, Five Element, ear acupuncture, etc)                                         | 4                        |
|                                        | 1b) Reasoning for treatment provided, based on historical context, literature sources, and/or consensus methods, with references where appropriate                          | 4,10, published protocol |
|                                        | 1c) Extent to which treatment was varied                                                                                                                                    | 4                        |
| 2. Details of needling                 | 2a) Number of needle insertions per subject per session (mean and range where relevant)                                                                                     | 4                        |
|                                        | 2b) Names (or location if no standard name) of points used (uni/bilateral)                                                                                                  | 4                        |
|                                        | 2c) Depth of insertion, based on a specified unit of measurement, or on a particular tissue level                                                                           | 4                        |
|                                        | 2d) Response sought (e.g. <i>de qi</i> or muscle twitch response)                                                                                                           | 4                        |
|                                        | 2e) Needle stimulation (e.g. manual, electrical)                                                                                                                            | 4                        |
|                                        | 2f) Needle retention time                                                                                                                                                   | 4                        |
|                                        | 2g) Needle type (diameter, length, and manufacturer or material)                                                                                                            | 4                        |
| 3. Treatment regimen                   | 3a) Number of treatment sessions                                                                                                                                            | 4                        |
|                                        | 3b) Frequency and duration of treatment sessions                                                                                                                            | 4                        |
| 4. Other components of treatment       | 4a) Details of other interventions administered to the acupuncture group (e.g. moxibustion, cupping, herbs, exercises, lifestyle advice)                                    | 4                        |
|                                        | 4b) Setting and context of treatment, including instructions to practitioners, and information and explanations to patients                                                 | 4                        |
| 5. Practitioner background             | 5) Description of participating acupuncturists (qualification or professional affiliation, years in acupuncture practice, other relevant experience)                        | 4                        |
| 6. Control or comparator interventions | 6a) Rationale for the control or comparator in the context of the research question, with sources that justify this choice                                                  | 5                        |
|                                        | 6b) Precise description of the control or comparator. If sham acupuncture or any other type of acupuncture-like control is used, provide details as for Items 1 to 3 above. | 5                        |

Note: This checklist, which should be read in conjunction with the explanations of the STRICTA items provided in the main text, is designed to replace CONSORT 2010's item 5 when reporting an acupuncture trial.

**Citation:** MacPherson H, Altman DG, Hammerschlag R, Youping L, Taixiang W, White A, Moher D; STRICTA Revision Group. Revised STAndards for Reporting Interventions in Clinical Trials of Acupuncture (STRICTA): extending the CONSORT statement. PLoS Med. 2010 Jun 8;7(6):e1000261
